# Supplementary material for: A MOF-mediated strategy for constructing human backbone-like CoMoS3@N-doped carbon nanostructures with multiple voids as a superior anode for sodium-ion batteries
Source: Royal Society of Chemistry journal article supplement (doi:10.1039/c9ta03873f), 2019-01-01
Supplement: c9ta03873f1.pdf [file c9ta03873f1.pdf]

## SUPPLEMENTARY INFORMATION

### **A MOF-Mediated Strategy for Constructing Human Backbone-like CoMoS<sub>3</sub>@N-doped Carbon Nanostructures with Multiple Voids as a Superior Anode for Sodium-Ion Batteries**

Su Hyun Yang,<sup>†a</sup> Seung-Keun Park,<sup>†b</sup> Jin Koo Kim,<sup>a</sup> and Yun Chan Kang<sup>\*a</sup>

<sup>a</sup> *Department of Materials Science and Engineering, Korea University, Anam-dong, Seongbuk-gu, Seoul 136-713, Republic of Korea. E-mail: [yckang@korea.ac.kr](mailto:yckang@korea.ac.kr)*

<sup>b</sup> *Department of Chemical Engineering, Kongju National University, 1223-24 Cheonandaero, Seobuk-gu, Cheonan 31080, Republic of Korea*

<sup>†</sup> *These authors contributed equally to this work.*

## Characterization

The morphologies and structures of specimen were investigated by microscopic characterization techniques, including scanning electron microscopy (SEM, VEGA3 SBH), and field-emission transmission electron microscopy (FE-TEM, JEM-2100 F). The crystallographic phases of the samples were confirmed through powder X-ray diffraction (XRD, X'Pert PRO), with Cu-K $\alpha$  radiation ( $\lambda = 1.5418 \text{ \AA}$ ) at the Korea Basic Science Institute (Daegu). Pyris 1 thermogravimetric (TGA) analyzer (Perkin Elmer) was used to confirm the carbon content in the samples, within the temperature range of 30–700 °C, at a ramp rate of 10 °C min<sup>-1</sup>, in air. Pore size distributions and surface areas of the samples were calculated using the Brunauer-Emmett-Teller (BET) method, with pure N<sub>2</sub> as the adsorbate gas. X-ray photoelectron spectroscopy (XPS, Thermo Scientific K-Alpha) was adopted for characterizing the chemical nature of the samples, and Raman spectroscopy (Jobin Yvon LabRamHR800, excited by a 632.8 nm He/Ne laser) was performed to examine the structure of the carbon in the samples. The Carbon contents of the sample were analyzed elemental analyzer (EA; vario MICRO cube and Cobalt, Molybdenum, and sulfur contents were investigated using the inductively coupled plasma optical emission spectroscopy (ICP-OES; Optima 8300 DV, Perkin Elmer) at the Korea Institute of Ceramic Engineering and Technology (KICET, Jinju).

## Electrochemical Measurements

Electrochemical measurement of the CoMoS<sub>3</sub>@NC, CoMoS<sub>3</sub> nanobackbones, MoS<sub>2</sub> tubes, and H-CoS<sub>2</sub> polyhedrons was performed by using standard 2032-type coin half cells. Sodium-ion battery (SIB) anodes were prepared by casting a slurry which included the active material, Super P, and sodium carboxymethylcellulose (weight ratio of 7:2:1, respectively) into DI water, and the mix was then applied onto copper foil, using a doctor blade. All cells were assembled in a glove box, and the coin cell consisted of Na metal as the counter-electrode, porous

polypropylene as the separator, and 1 M NaClO<sub>4</sub> (dissolved in a mixture of ethylene carbonate (EC)/dimethyl carbonate (DMC) at a volumetric ratio of 1:1, with addition of 5 wt% fluoroethylene carbonate (FEC)) as the electrolyte. The charge/discharge characteristics and cyclic voltammetry (CV) measurements were performed using a battery analyzer (WonATech, WBCS-3000s cycler) over the potential range of 0.001–3.0 V at various current densities. The diameter of the electrode was 14 mm, and its mass loading was approximately 1.4 mg cm<sup>-2</sup>. Electrochemical impedance spectroscopy (EIS) analyses were obtained, through the frequency ranges of 0.01–100 kHz.

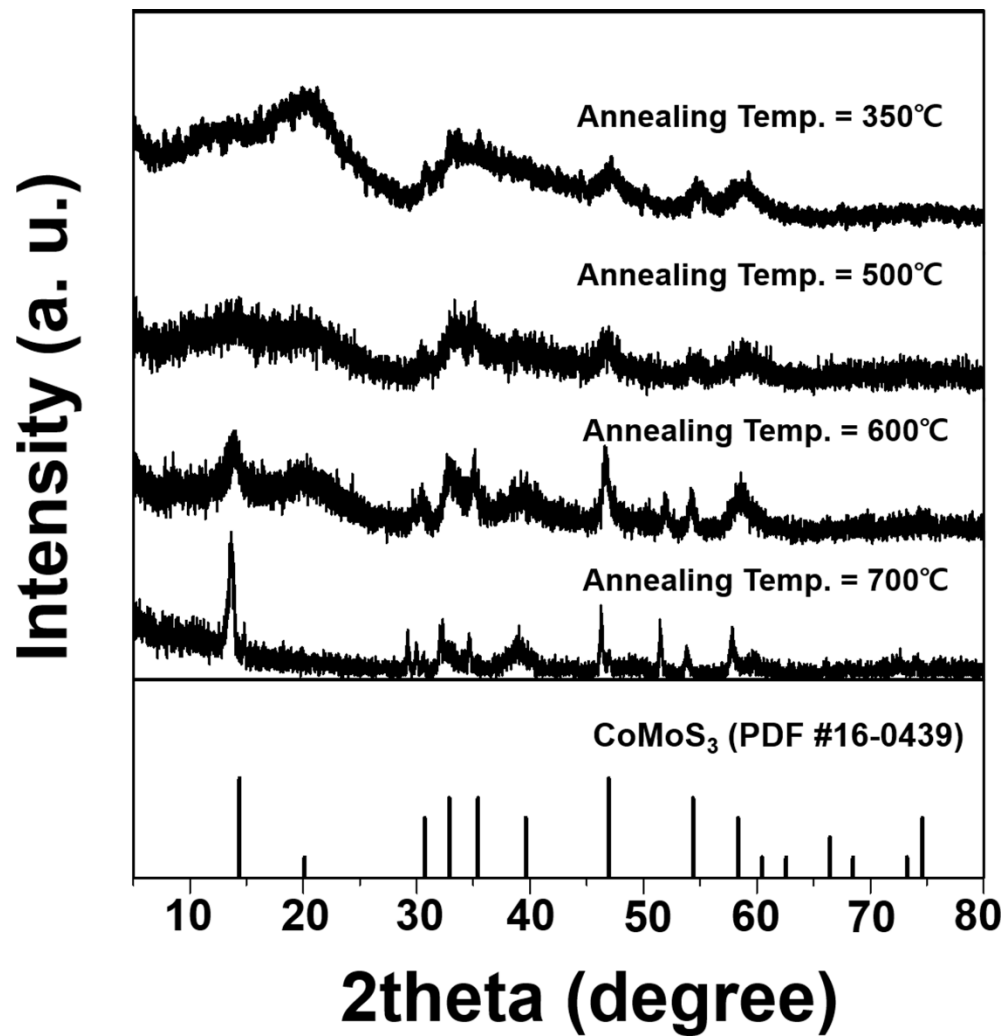

**Fig. S1** XRD patterns of the CoMoS<sub>3</sub>@NC annealed at temperatures of 350, 500, 600, and 700°C.

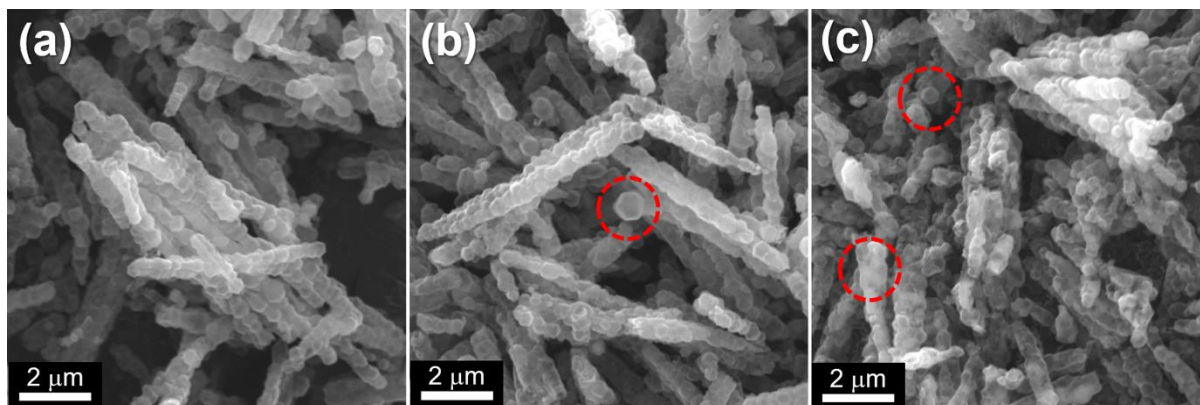

**Fig. S2** Morphologies of CoMoS<sub>3</sub>@NC annealed at temperatures of (a) 500, (b) 600, and (c) 700°C.

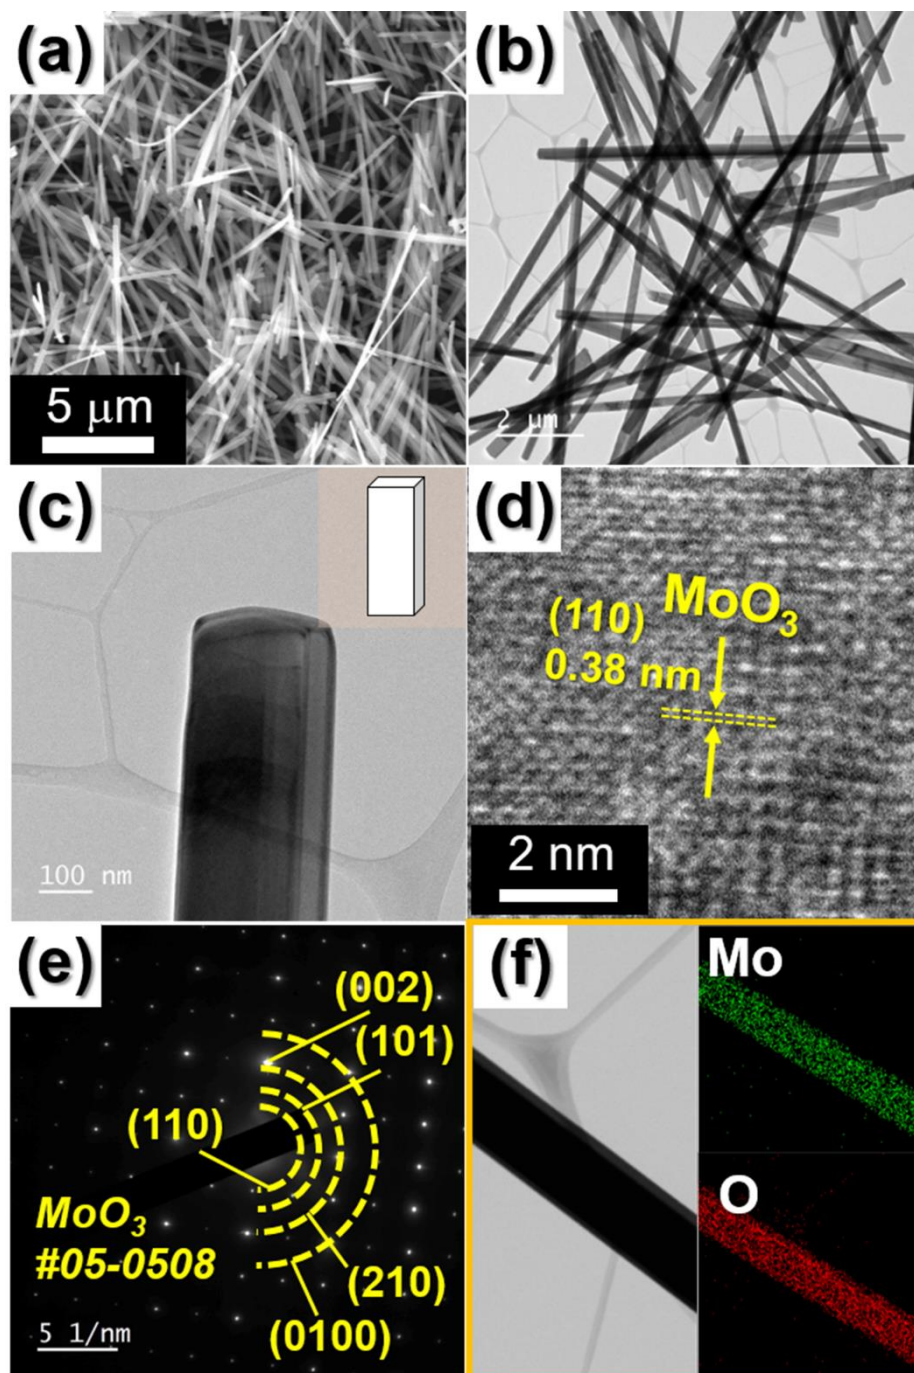

**Fig. S3** Morphologies, SAED pattern, and elemental mapping images of MoO<sub>3</sub> nanobelt: (a) SEM image, (b,c) TEM images, (d) HR-TEM image, (e) SAED pattern, and (f) elemental mapping images.

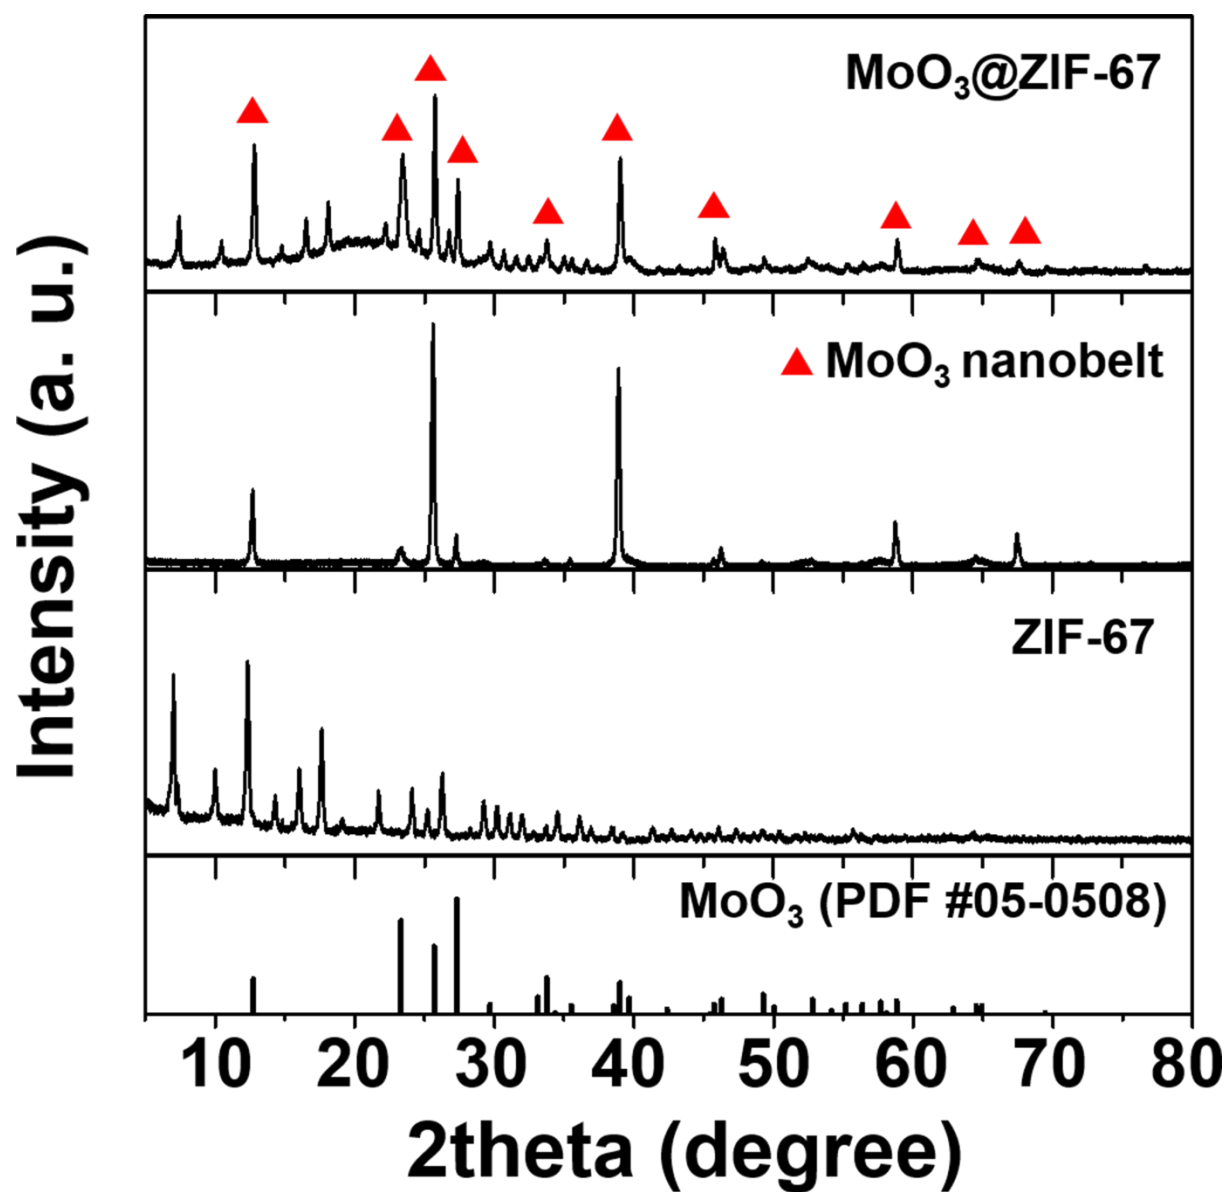

Fig. S4 XRD patterns of the MoO<sub>3</sub>@ ZIF-67, MoO<sub>3</sub> nanobelt, and ZIF-67.

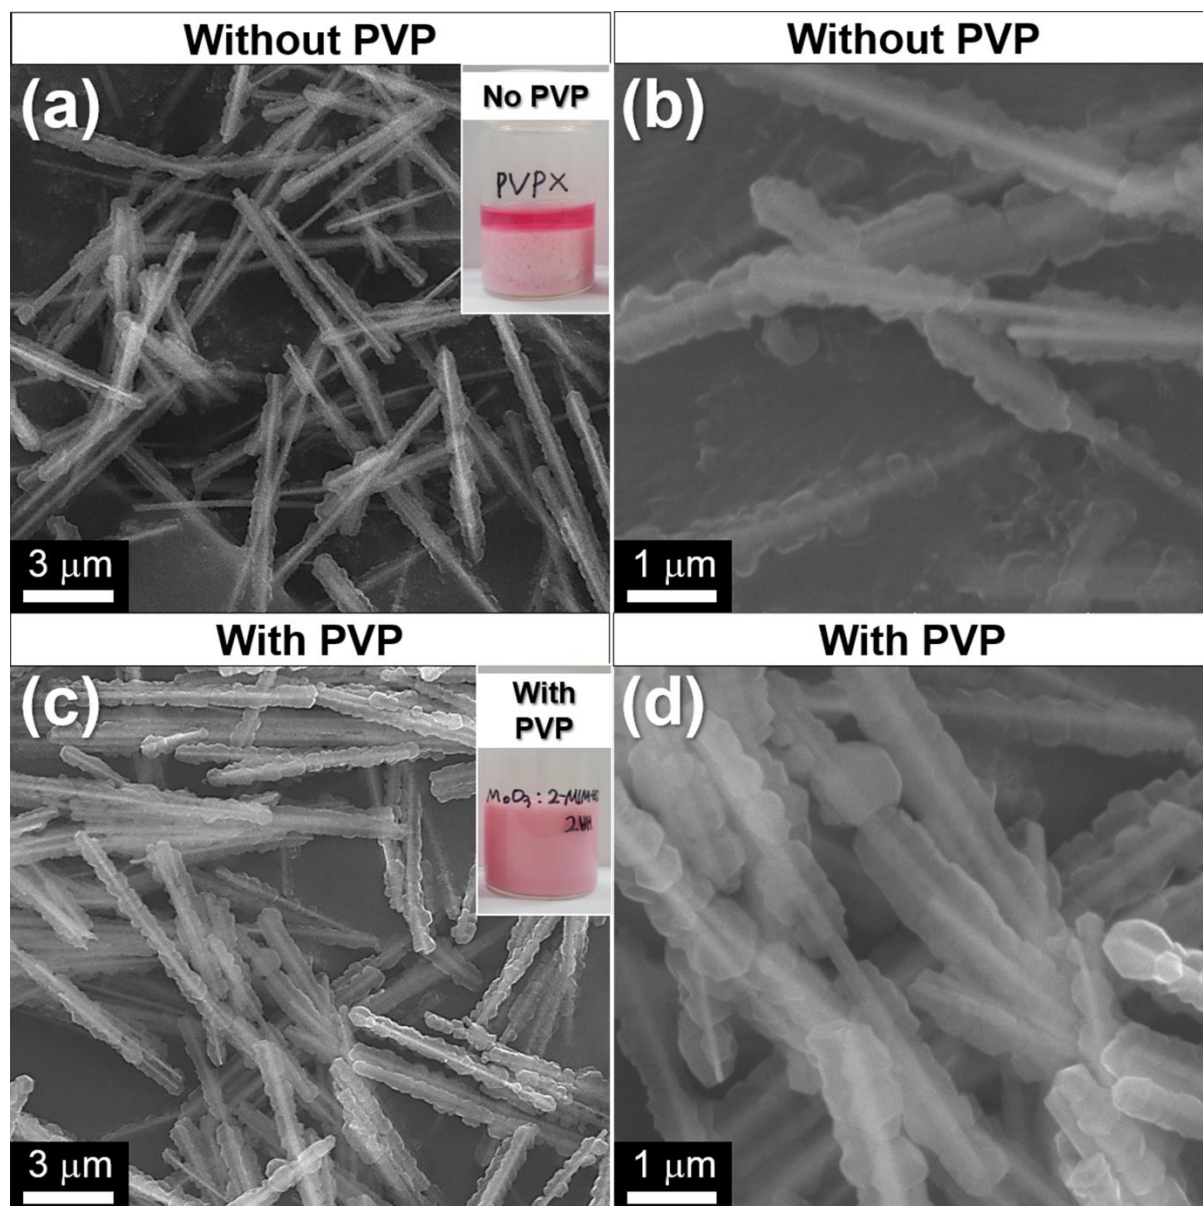

**Fig. S5** Morphologies of  $\text{MoO}_3@\text{ZIF-67}$  (a,b) without and (c,d) with PVP.



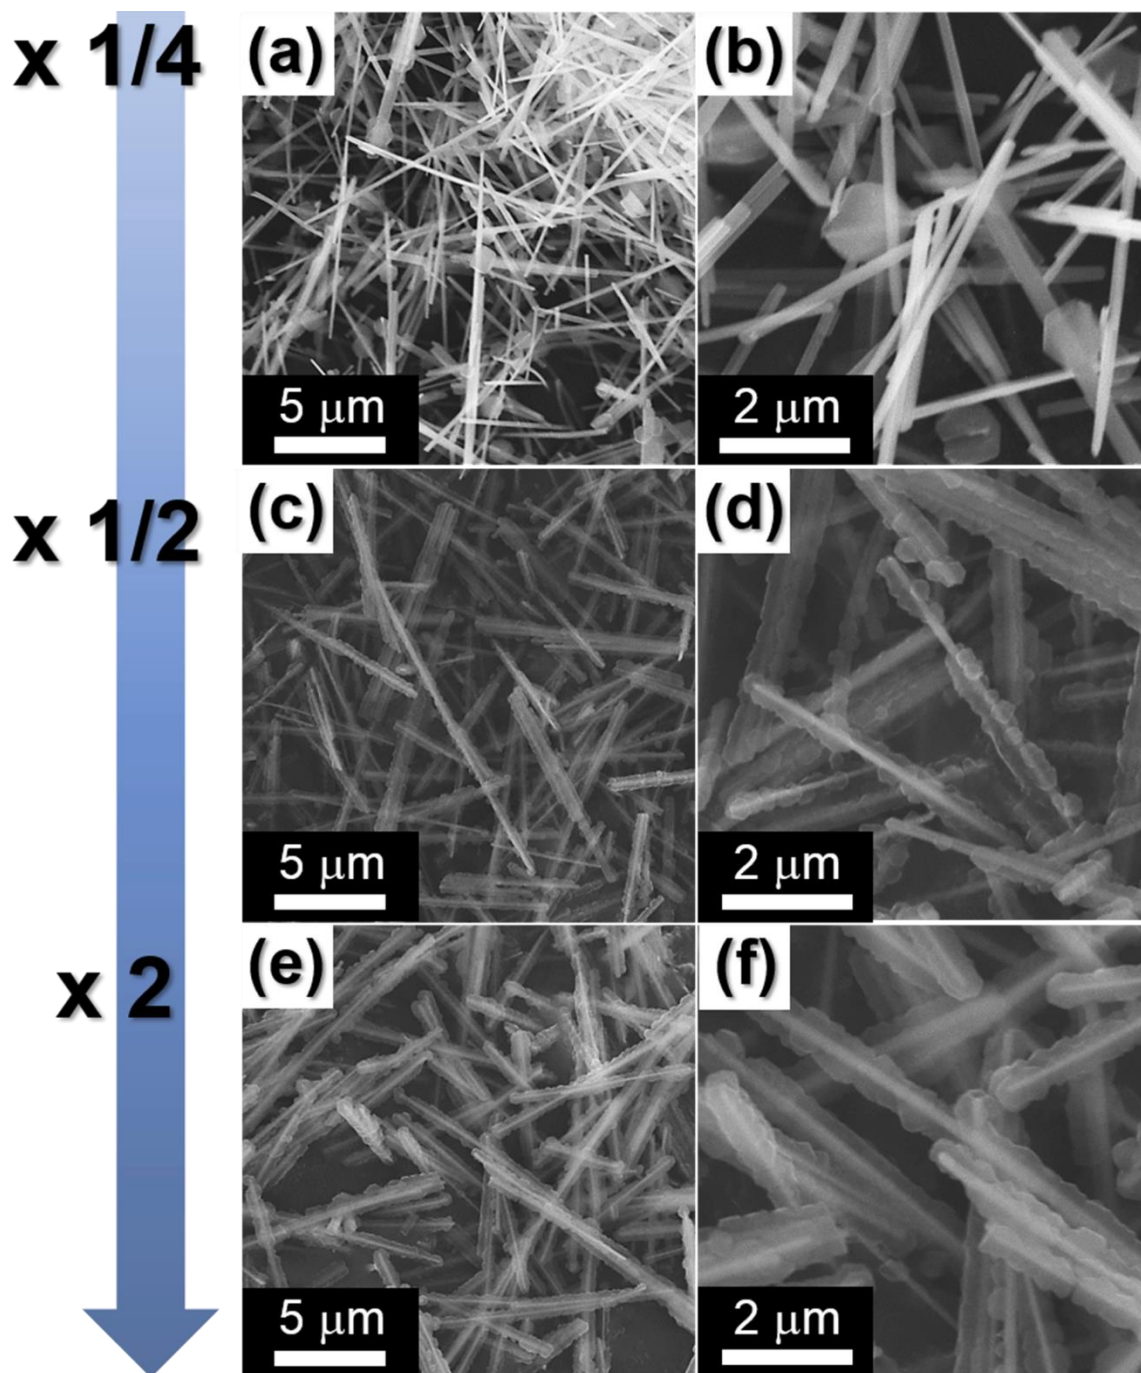

**Fig. S6.** Morphologies of  $\text{MoO}_3@ \text{ZIF-67}$  formed from different amount of 2-MIM.

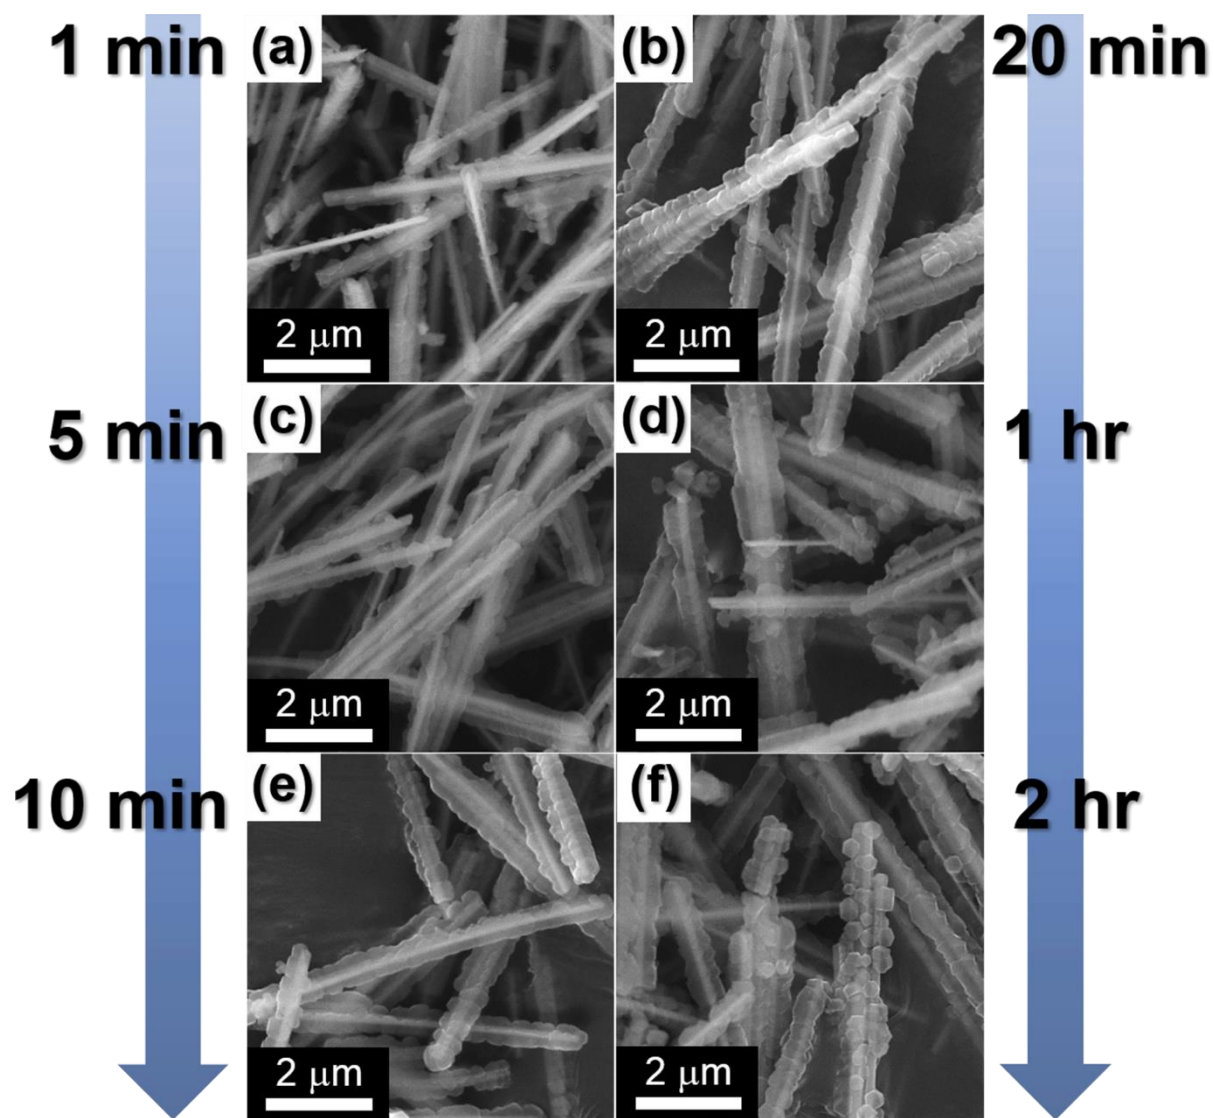

**Fig. S7** Morphologies of MoO<sub>3</sub>@ZIF-67 formed with different reaction times for ZIF-67 coating.

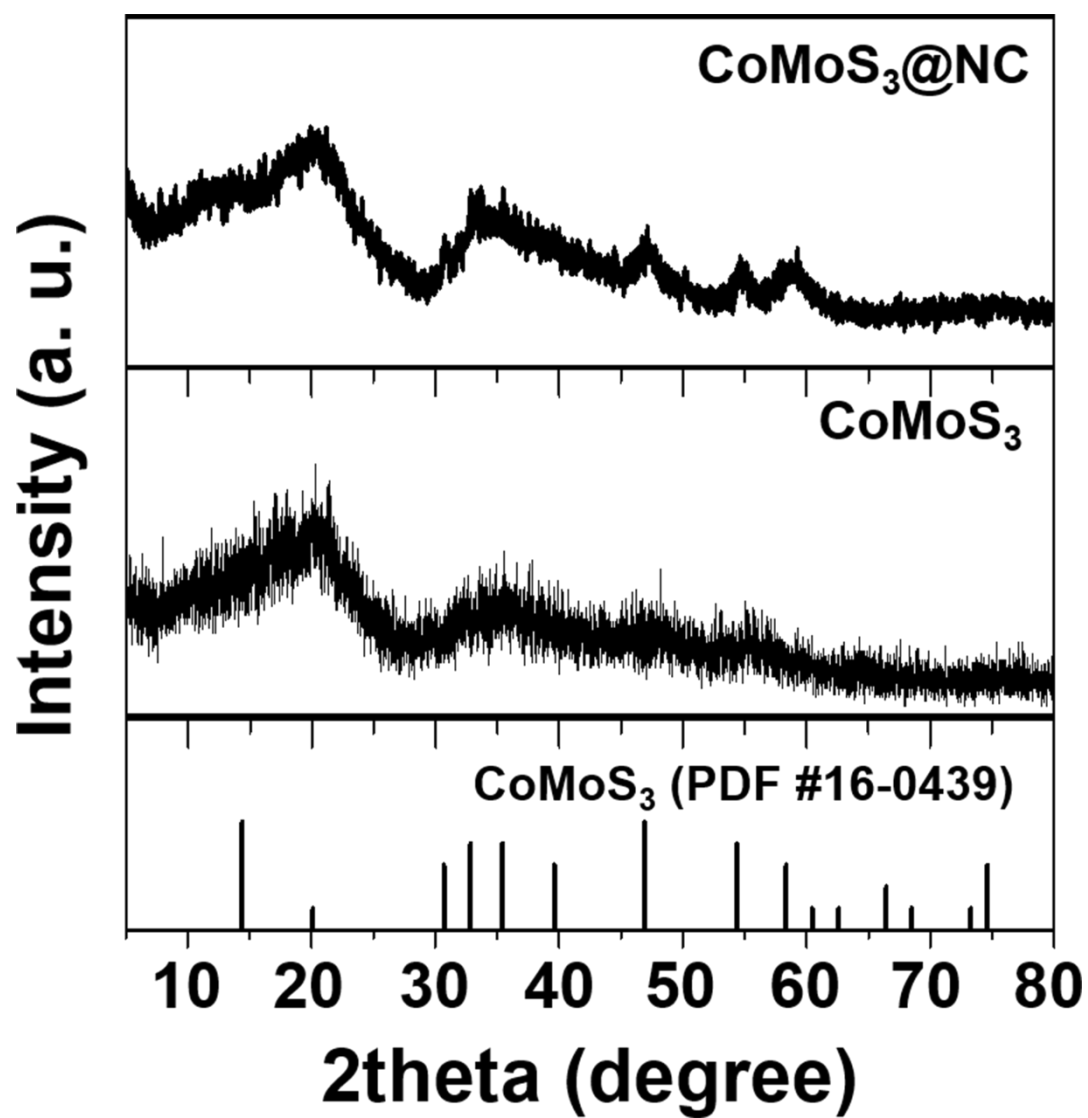

**Fig. S8** XRD patterns of CoMoS<sub>3</sub>@NC and CoMoS<sub>3</sub>.

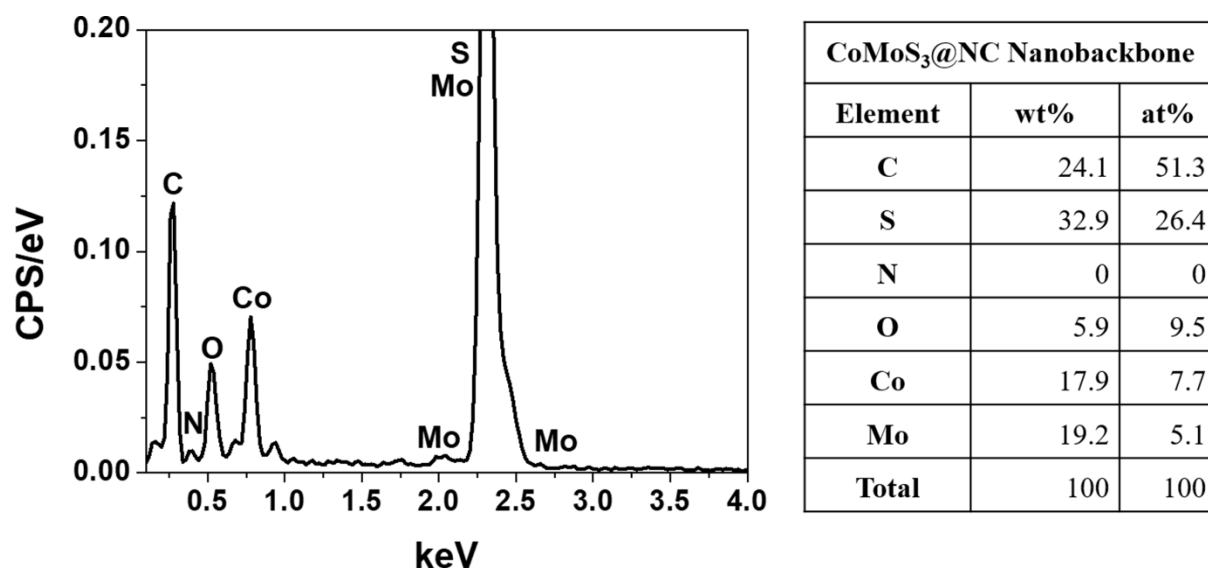

**Fig. S9** EDX measurement of CoMoS<sub>3</sub>@NC.

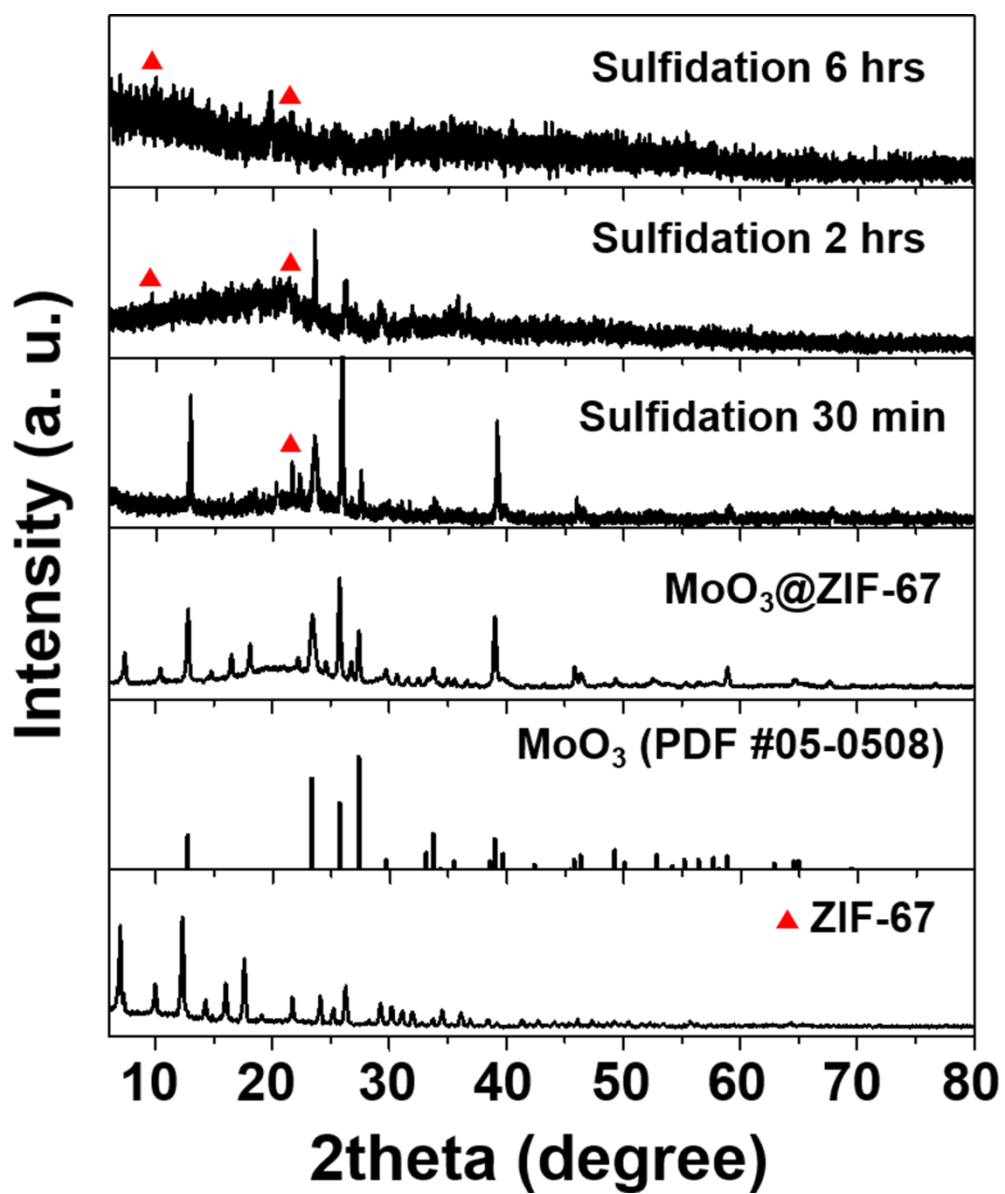

**Fig. S10** XRD patterns of MoO<sub>3</sub>@ZIF-67 obtained at various sulfidation times.

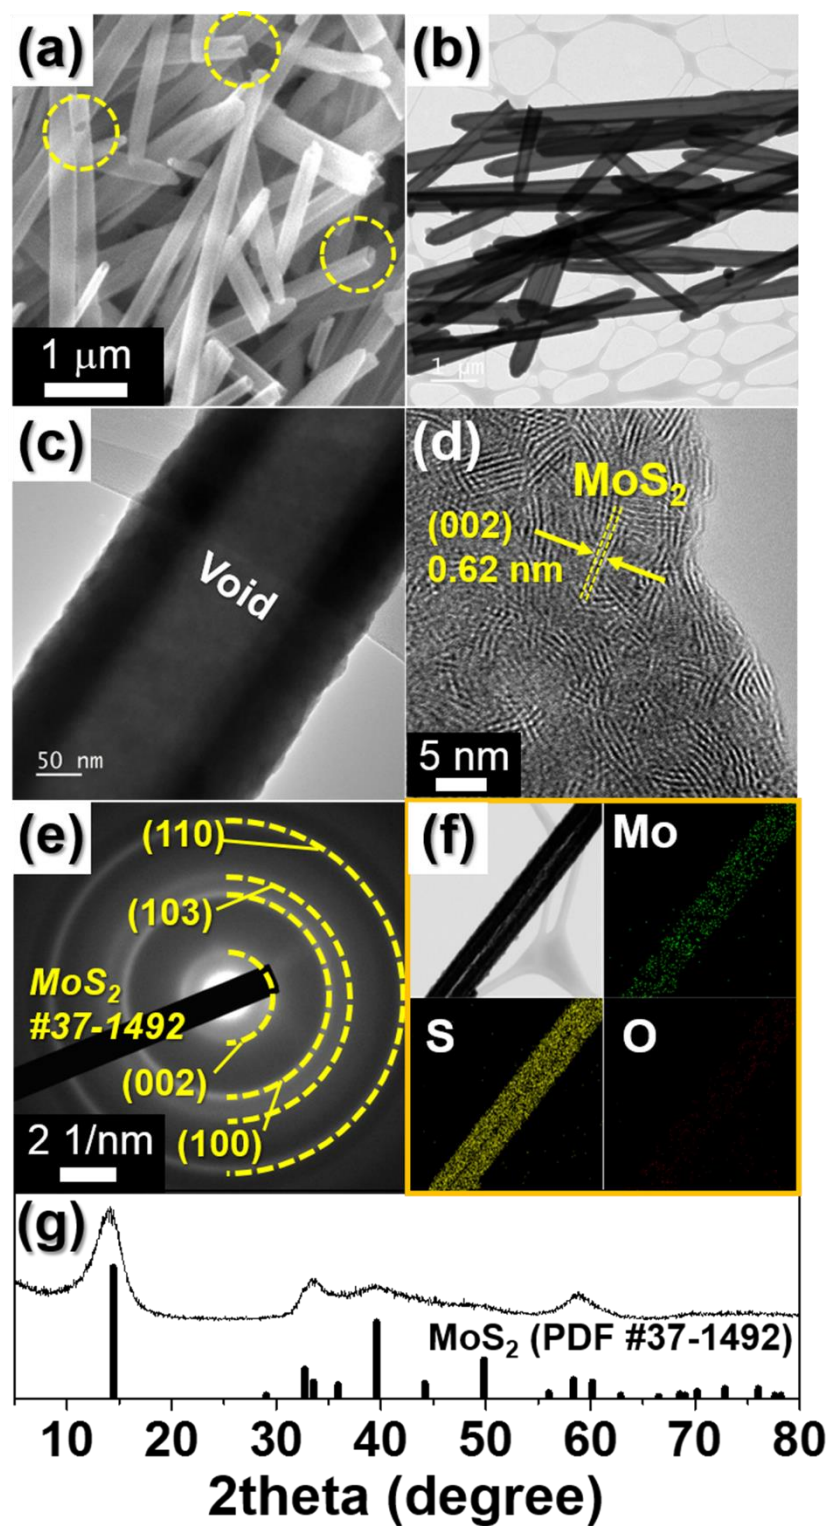

**Fig. S11** Morphologies, SAED pattern, and elemental mapping images, XRD pattern of MoS<sub>2</sub> tube: (a) SEM image, (b,c) TEM images, (d) HR-TEM image, (e) SAED pattern, (f) elemental mapping images, and (g) XRD pattern.



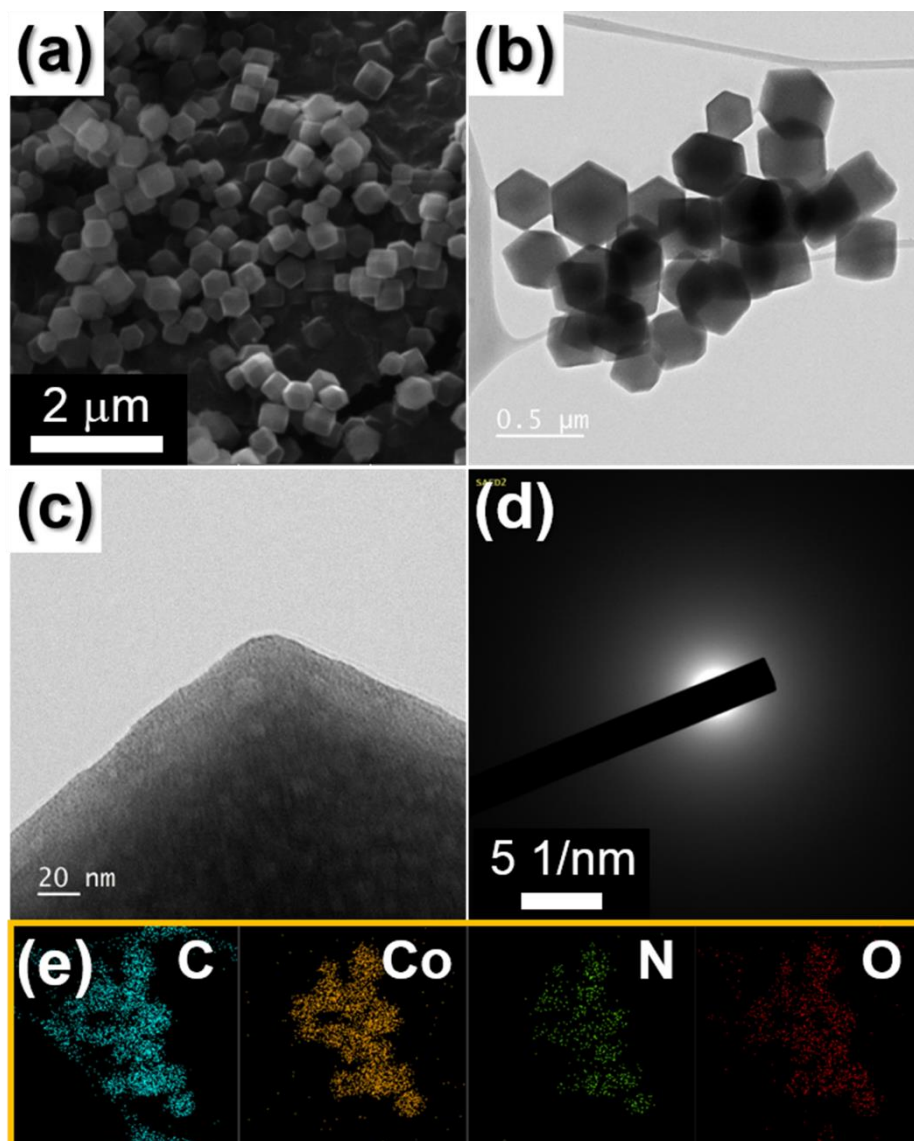

**Fig. S12** Morphologies, SAED pattern, and elemental mapping images of ZIF-67: (a) SEM image, (b,c) TEM images, (d) SAED pattern, and (e) elemental mapping images.

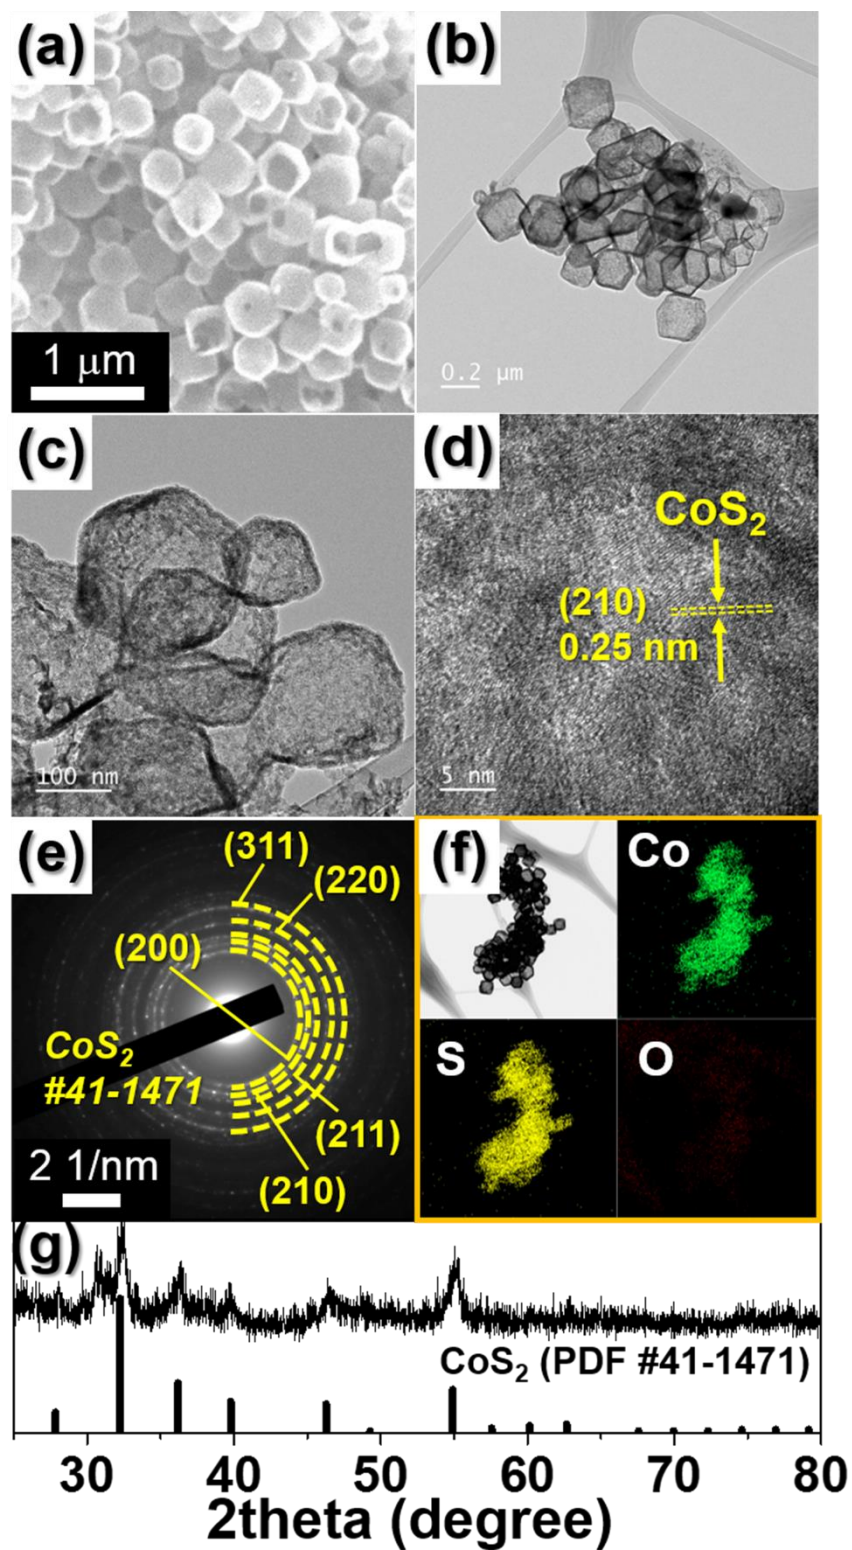

**Fig. S13** Morphologies, SAED pattern, elemental mapping images, and XRD pattern of H-CoS<sub>2</sub>: (a) SEM image, (b,c) TEM images, (d) HR-TEM image, (e) SAED pattern, (f) elemental mapping images, and (g) XRD pattern.



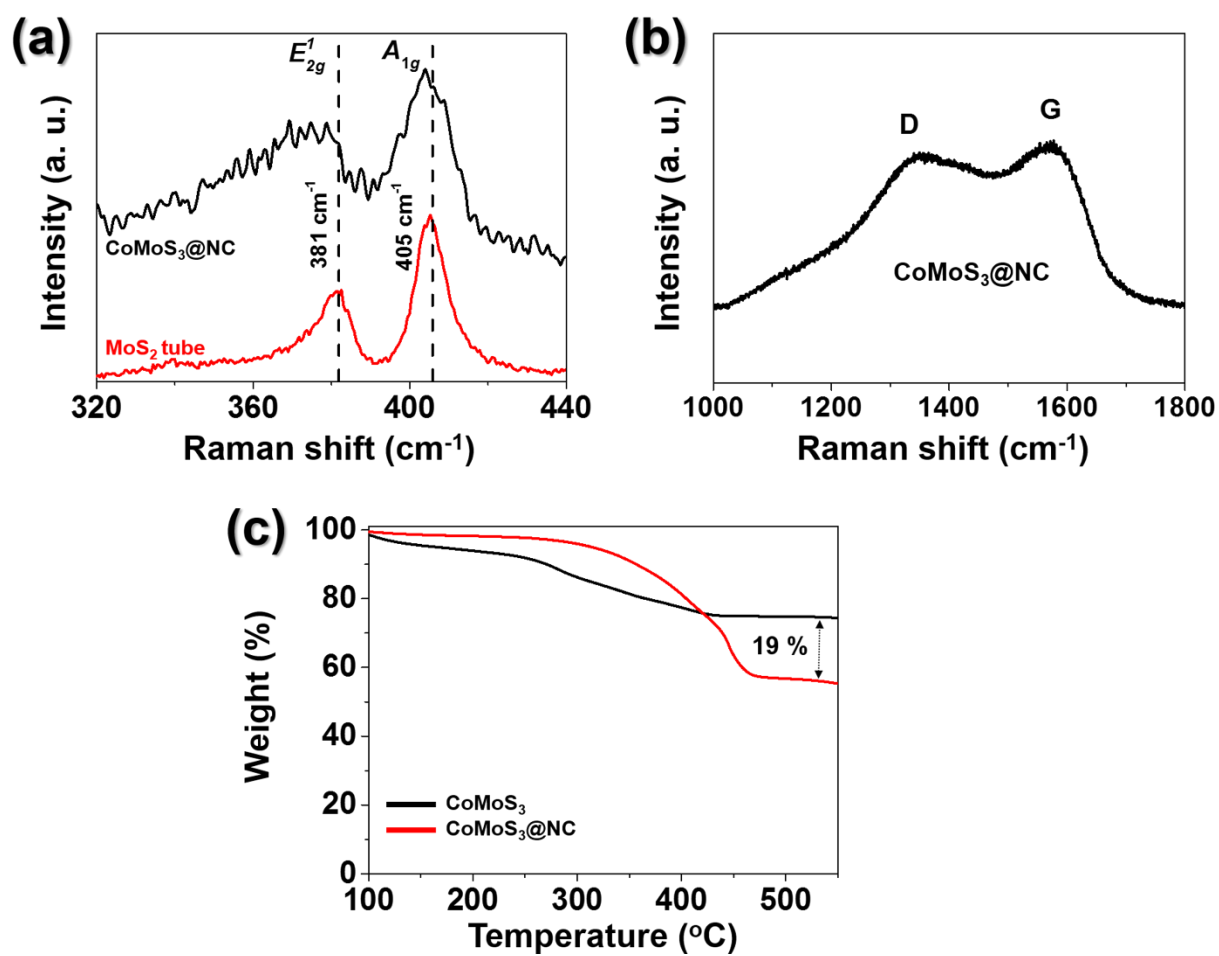

**Fig. S14** (a) Raman spectra of CoMoS<sub>3</sub>@NC and MoS<sub>2</sub> tube, (b) Raman spectra of CoMoS<sub>3</sub>@NC, and (c) TGA curves of the CoMoS<sub>3</sub>@NC and CoMoS<sub>3</sub>.

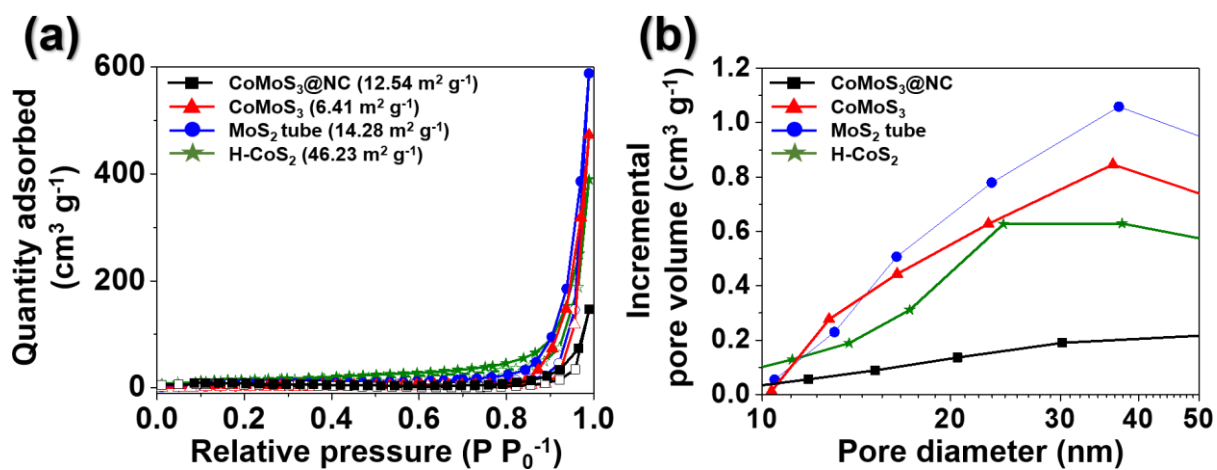

**Fig. S15** (a) N<sub>2</sub> adsorption and desorption isotherms and (b) BJH pore size distributions of CoMoS<sub>3</sub>@NC, CoMoS<sub>3</sub>, MoS<sub>2</sub> tube, and H-CoS<sub>2</sub>.

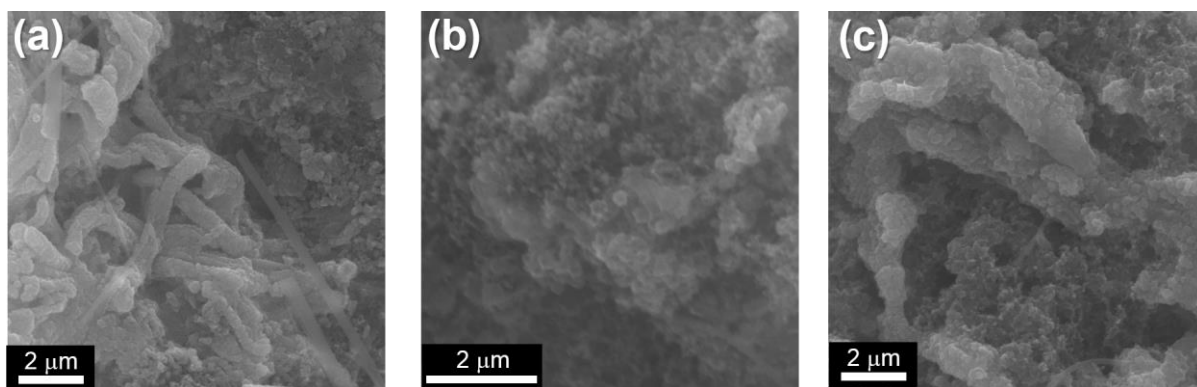

**Fig. S16** Morphologies of (a) MoS<sub>2</sub> tubes, (b) H-CoS<sub>2</sub>, and (c) CoMoS<sub>3</sub> after 100cycle.

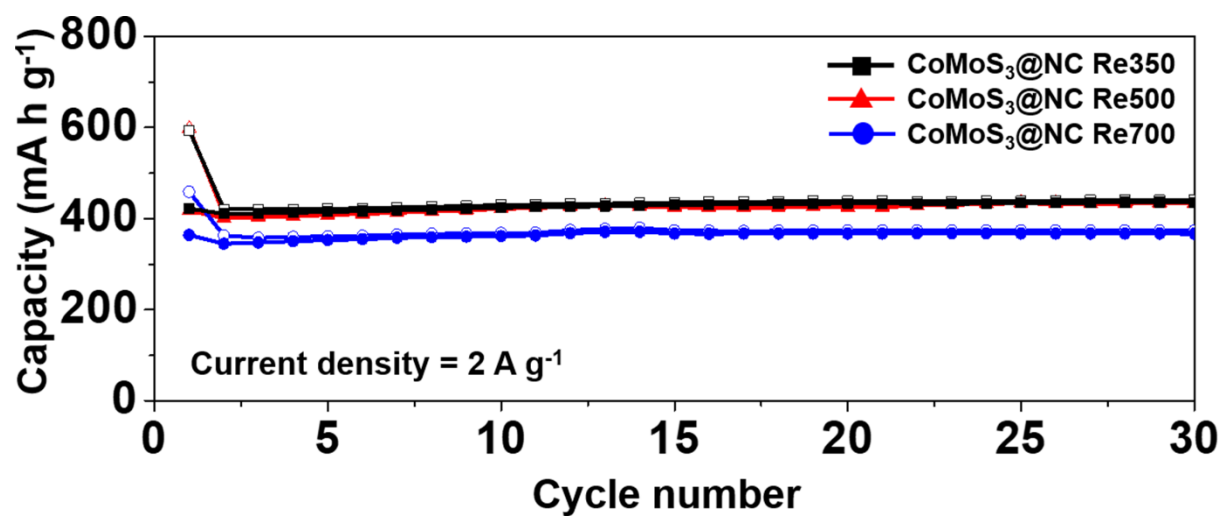

**Fig. S17** Cycle performances of CoMoS<sub>3</sub>@NC formed at different annealing temperatures at a current density of 2 A g<sup>-1</sup>.

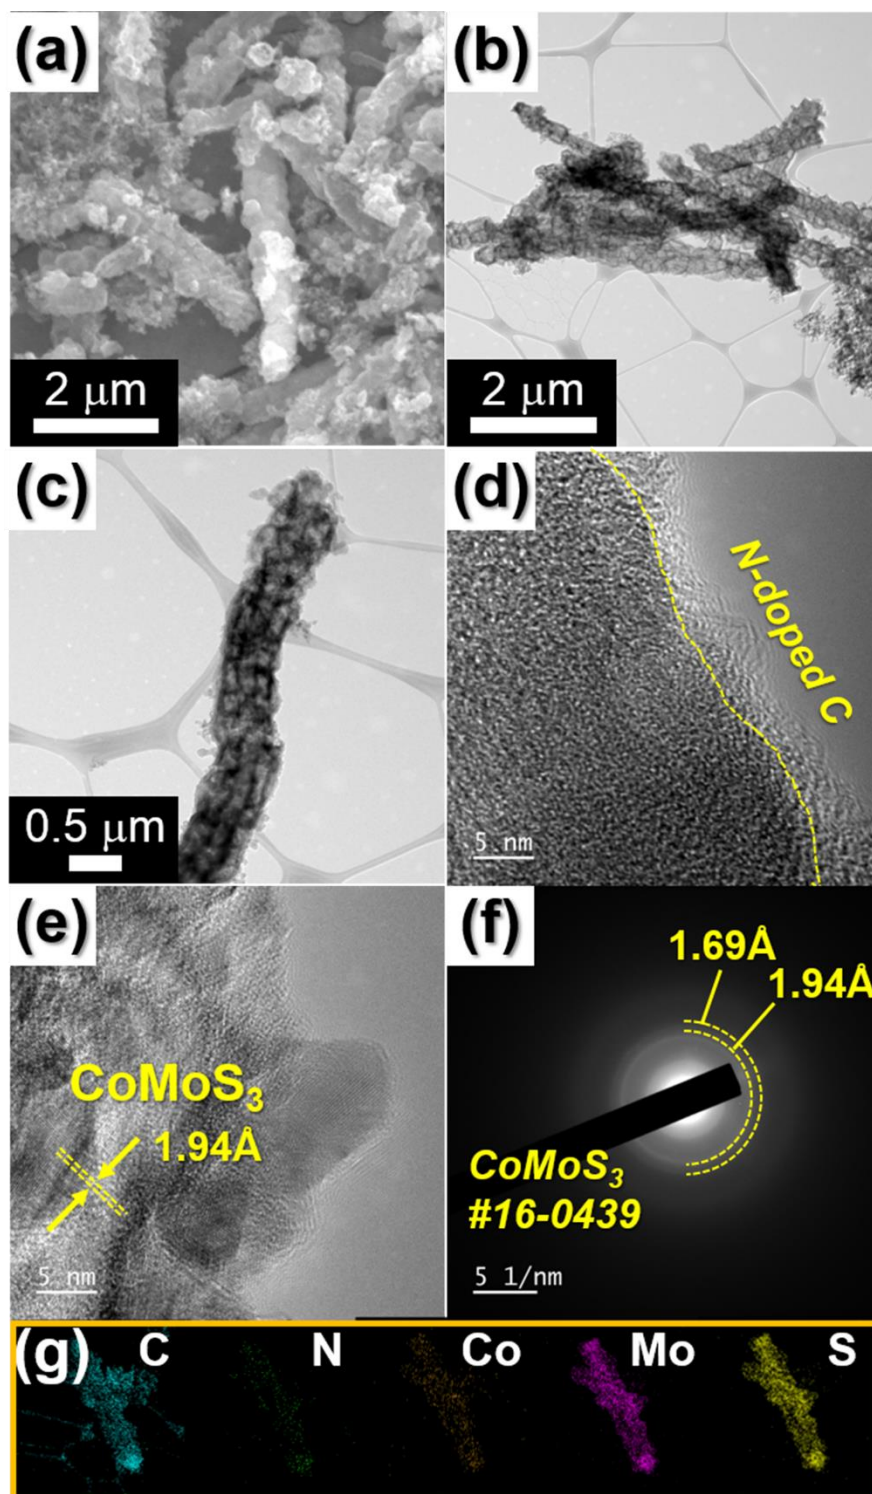

**Fig. S18** Morphologies, SAED pattern, elemental mapping images of CoMoS<sub>3</sub>@NC after 100cycle: (a) SEM image, (b,c) TEM images, (d-e) HR-TEM images, (f) SAED pattern, and (g) elemental mapping images.

## ***Equivalent circuit model***

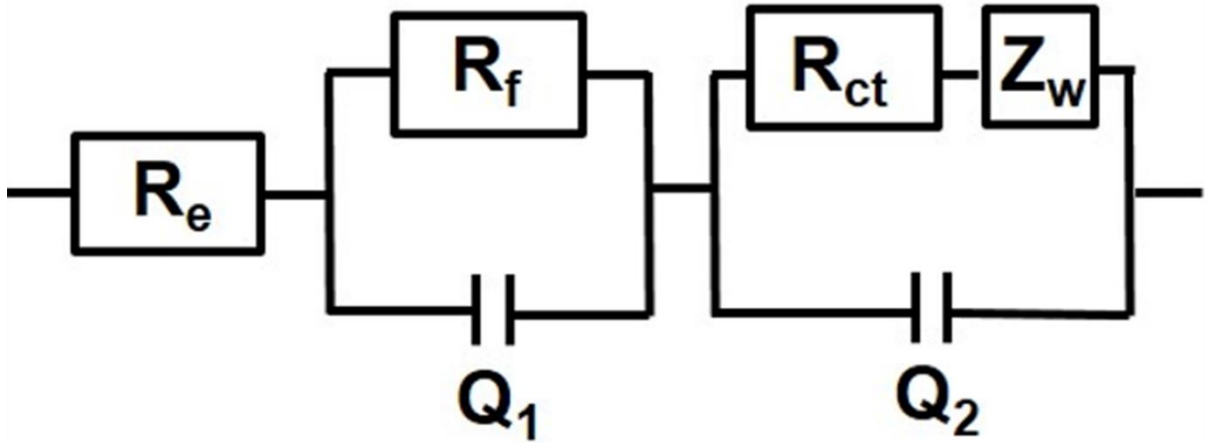

**Fig. S19** Randle-type equivalent circuit model used for EIS fitting.

$R_e$ : Electrolyte resistance, corresponding to the intercept of high frequency semicircle at  $Z_{re}$  axis

$R_f$ : SEI layer resistance corresponding to the high-frequency semicircle

$Q_1$ : Dielectric relaxation capacitance corresponding to the high-frequency semicircle

$R_{ct}$ : Charge transfer resistance related to the middle-frequency semicircle

$Q_2$ : Associated double-layer capacitance related to the middle-frequency semicircle

$Z_w$ : Na-ion diffusion resistance

**Table S1.** C, H, O, and N contents in CoMoS<sub>3</sub>@NC composite measured by EA analysis.

| CoMoS <sub>3</sub> @NC composite |      |      |
|----------------------------------|------|------|
| Element                          | wt%  | at%  |
| C                                | 14.1 | 24.9 |
| H                                | 2.5  | 53.2 |
| O                                | 13.9 | 18.5 |
| N                                | 2.3  | 3.4  |

**Table S2.** Electrochemical properties of various Co-, Mo-, and CoMo sulfides materials applied as sodium-ion batteries reported in the previous literatures.

| Material                                                    | Voltage range(V) | Current rate [mA g <sup>-1</sup> ] | Discharge capacity [mA h g <sup>-1</sup> ] | Cycle number | Initial Coulombic efficiency [%] | Capacity retention [%, from the 2 <sup>nd</sup> cycle] | Rate capacity [mA h g <sup>-1</sup> ] | Loading mass of active material | Ref.            |
|-------------------------------------------------------------|------------------|------------------------------------|--------------------------------------------|--------------|----------------------------------|--------------------------------------------------------|---------------------------------------|---------------------------------|-----------------|
| <b>CoMoS<sub>3</sub>@NC</b>                                 | <b>0.001-3</b>   | <b>500</b>                         | <b>478</b>                                 | <b>200</b>   | <b>77.7</b>                      | <b>83</b>                                              | <b>349 (10.0 A g<sup>-1</sup>)</b>    | <b>1.4 mg</b>                   | <b>Our work</b> |
| CoS <sub>2</sub> /reduced graphene oxide                    | 0.01-3           | 100                                | 367                                        | 100          | 67                               | 80                                                     | 297 (1.0 A g <sup>-1</sup> )          | 1-1.2 mg                        | [S1]            |
| MoS <sub>2</sub> nanosheets                                 | 0.01-3           | 40                                 | 386                                        | 100          | ~41                              | ~57                                                    | 251 (0.3 A g <sup>-1</sup> )          | 1.2 mg                          | [S2]            |
| MoS <sub>2</sub> /Co <sub>9</sub> S <sub>8</sub> /C         | 0.01-3           | 500                                | 546                                        | 100          | 85                               | ~79                                                    | 222 (10 A g <sup>-1</sup> )           | 1.3-1.8 mg                      | [S3]            |
| MoS <sub>2</sub> @C nanotube composites                     | 0.01-3           | 250                                | 480                                        | 200          | -                                | 86                                                     | 370 (2.5 A g <sup>-1</sup> )          | 1 mg                            | [S4]            |
| Co <sub>9</sub> S <sub>8</sub> /MoS <sub>2</sub> yolk shell | 0.01-3           | 300                                | 476                                        | 100          | 50                               | 90                                                     | 403 (2.0 A g <sup>-1</sup> )          | -                               | [S5]            |
| Yolk-shell SnS-MoS <sub>2</sub>                             | 0.001-2.5        | 500                                | 396                                        | 100          | 82                               | 89                                                     | 238 (7.0 A g <sup>-1</sup> )          | 1.4 mg                          | [S6]            |

## Reference

- [S1] K. Xie, L. Li, X. Deng, W. Zhou and Z. Shao, *J. Alloys Compd.*, 2017, **726**, 394-402.  
[S2] D. Su, S. Dou and G. Wang, *Adv. Energy Mater.*, 2015, **5**, 1401205.  
[S3] J. Xiang and T. Song, *Chem. Commun.*, 2017, **53**, 10820-10823.  
[S4] X. Zhang, X. Li, J. Liang, Y. Zhu and Y. Qian, *Small*, 2016, **12**, 2484-2491.  
[S5] H. Geng, J. Yang, Z. Dai, Y. Zhang, Y. Zheng, H. Yu, H. wang, Z. Luo, Y. Guo, Y. Zhang, H. Fan, X. Wu, J. Zheng, Y. Yang, Q. Yan and H. Gu, *Small*, 2017, **13**, 1603490.  
[S6] S. H. Choi and Y. C. Kang, *ACS Appl. Mater. Interfaces*, 2015, **7**, 24694-24702.
